# Supplementary material
Source: Springer Nature journal article supplement (https://www.springermedizin.de/resource/supplementary/12875_2010_489_MOESM3_ESM.pdf/9434720)

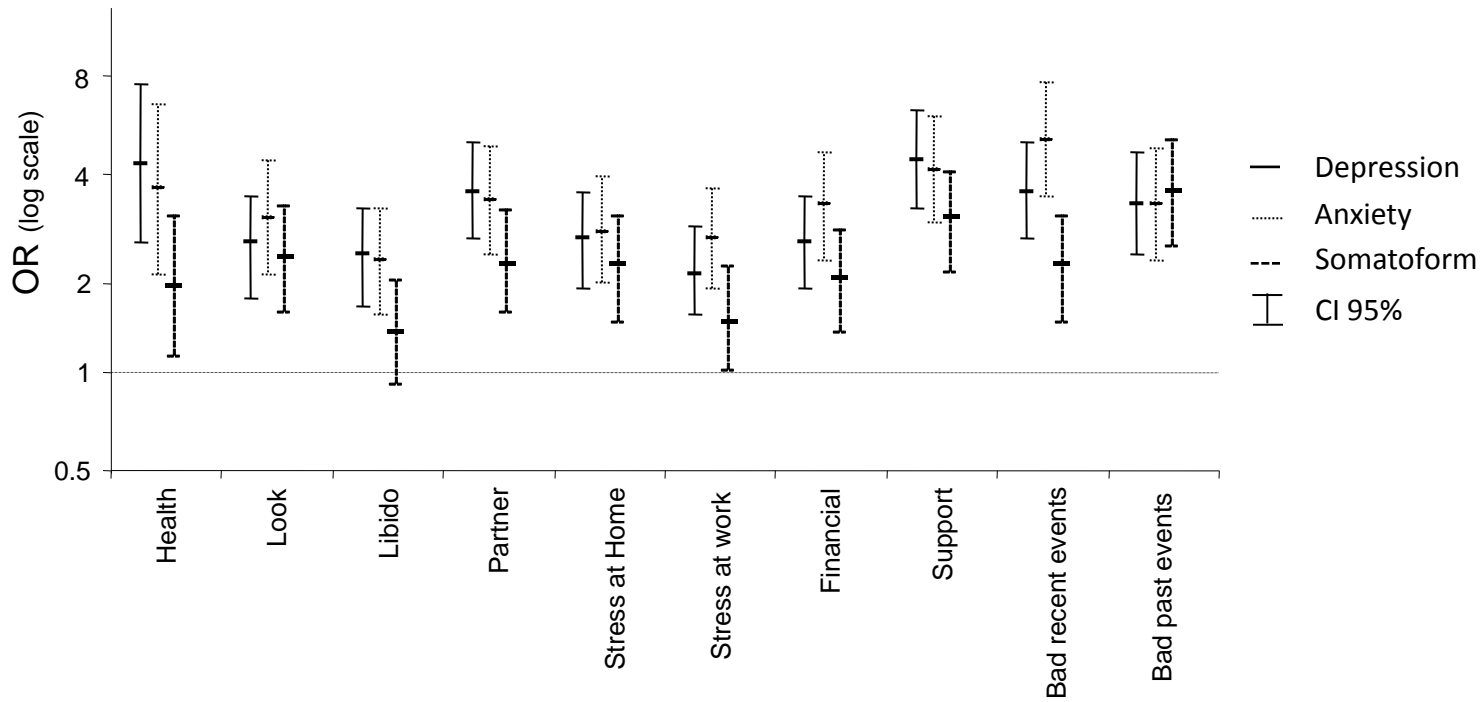

Supplement: MOESM3 [file 9434720]
